# Supplementary material for: Acentric and chiral four-connected metal–organic frameworks based on the racemic binaphthol-like chiral ligand of 4-(1-H(or methyl)-imidaozol-1-yl)benzoic acid
Source: Royal Society of Chemistry journal article supplement (doi:10.1039/c0ce00789g), 2011-01-01
Supplement: c0ce00789g.pdf [file c0ce00789g.pdf]

## Supporting Information

### **Acentric and Chiral 4-Connected Metal-Organic Frameworks based on Racemic Chiral Binaphthol-like Ligand of 4-(1-H(*or Methyl*)-imidazol-1-yl)benzoic acid**

*Ke-Hui Cui, Shi-Yan Yao, Hai-Qin Li, Yan-Tao Li, Chun-Jie Jiang,\* Yun-Qi Tian\**

\* Corresponding author. E-mail: [yqtian@lnnu.edu.cn](mailto:yqtian@lnnu.edu.cn). [jiangcj@lnnu.edu.cn](mailto:jiangcj@lnnu.edu.cn). Fax:  
86-411-82156989. Tel: 86-411-82159141

Institute of Chemistry for Functionalized Materials, College of Chemistry and  
Chemical Engineering, Liaoning Normal University, 116029 Dalian, PR CHINA.

**Table S1 Crystallographic Data and Structure Refinement Summary for HIBA and HMIBA**

|                                                     | HIBA                                                            | HMIBA.                                                          |
|-----------------------------------------------------|-----------------------------------------------------------------|-----------------------------------------------------------------|
| Formula                                             | C <sub>10</sub> H <sub>11</sub> ClN <sub>2</sub> O <sub>3</sub> | C <sub>11</sub> H <sub>13</sub> ClN <sub>2</sub> O <sub>3</sub> |
| Fw                                                  | 242.66                                                          | 256.68                                                          |
| Crystal system                                      | Triclinic                                                       | Monoclinic                                                      |
| Space group                                         | <i>P</i> -1                                                     | <i>P</i> 2 <sub>1</sub> / <i>c</i>                              |
| <i>a</i> (Å)                                        | 7.201(2)                                                        | 14.465(8)                                                       |
| <i>b</i> (Å)                                        | 7.382(2)                                                        | 7.830(4)                                                        |
| <i>c</i> (Å)                                        | 11.328(3)                                                       | 11.406(6)                                                       |
| $\alpha$ (deg)                                      | 77.121(3)                                                       | 90                                                              |
| $\beta$ (deg)                                       | 77.612(2)                                                       | 111.139(6)                                                      |
| $\gamma$ (deg)                                      | 75.969(3)                                                       | 90                                                              |
| <i>V</i> (Å <sup>3</sup> )                          | 561.2(6)                                                        | 1205.0(11)                                                      |
| <i>Z</i>                                            | 2                                                               | 4                                                               |
| <i>D</i> <sub>calcd.</sub>                          | 1.424                                                           | 1.415                                                           |
| Reflections collected / unique                      | 3495/2574                                                       | 7083/2826                                                       |
| GOF                                                 | 1.056                                                           | 1.037                                                           |
| Final <i>R</i> indices [ <i>I</i> > 2σ( <i>I</i> )] | <i>R</i> <sub>1</sub> =0.0731, <i>wR</i> <sub>2</sub> = 0.2171  | <i>R</i> <sub>1</sub> = 0.0522, <i>wR</i> <sub>2</sub> = 0.1393 |

---

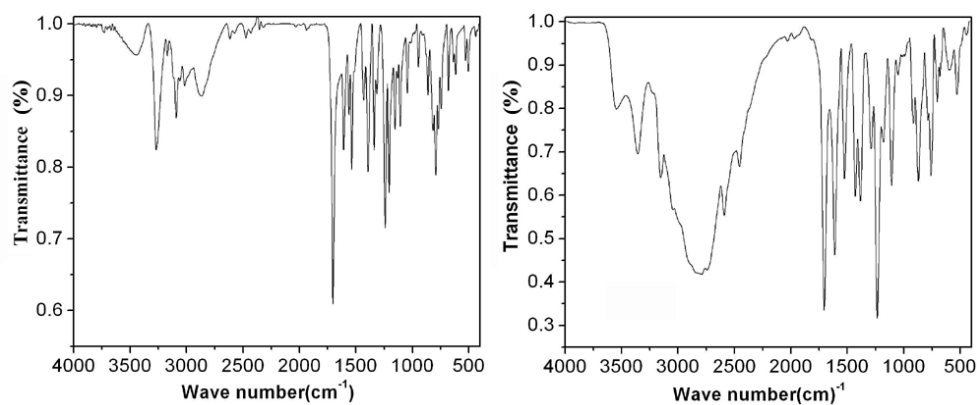

**Figure S1** FT-IR of HIBA and HMIBA.

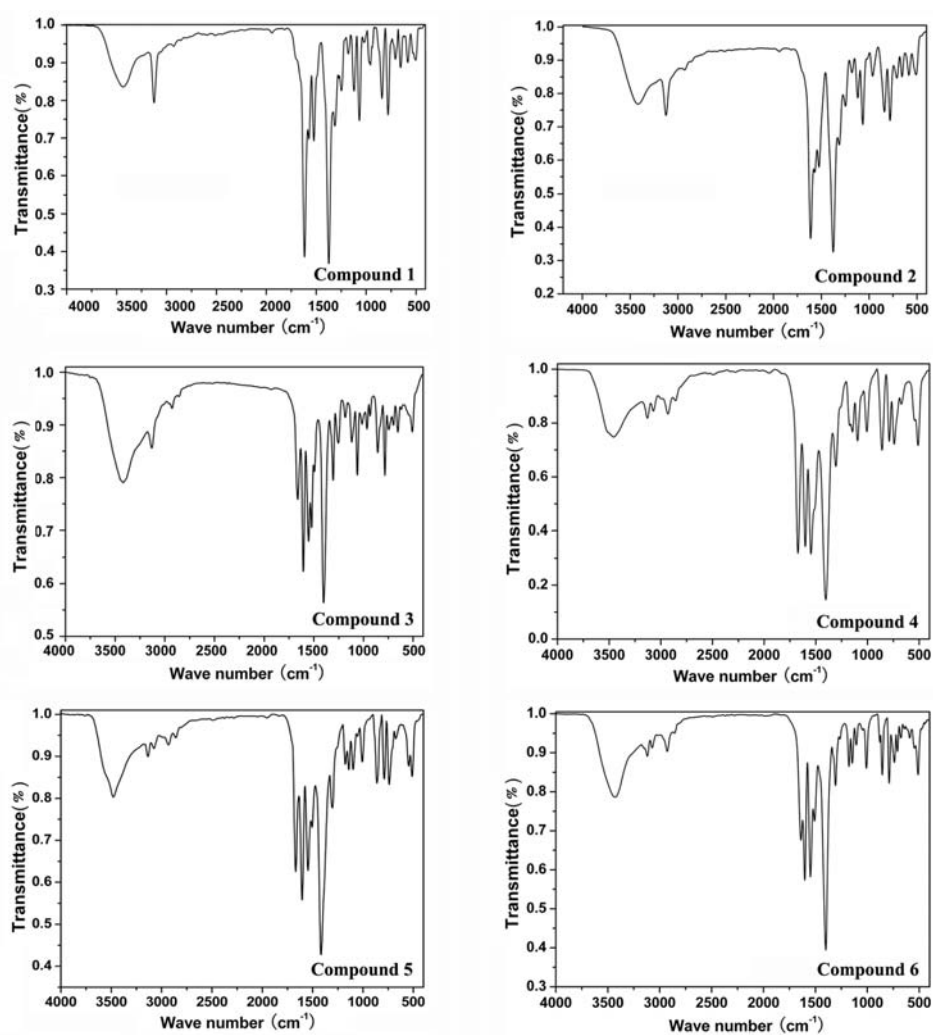

**Figure S2** FT-IR of compounds 1–6.

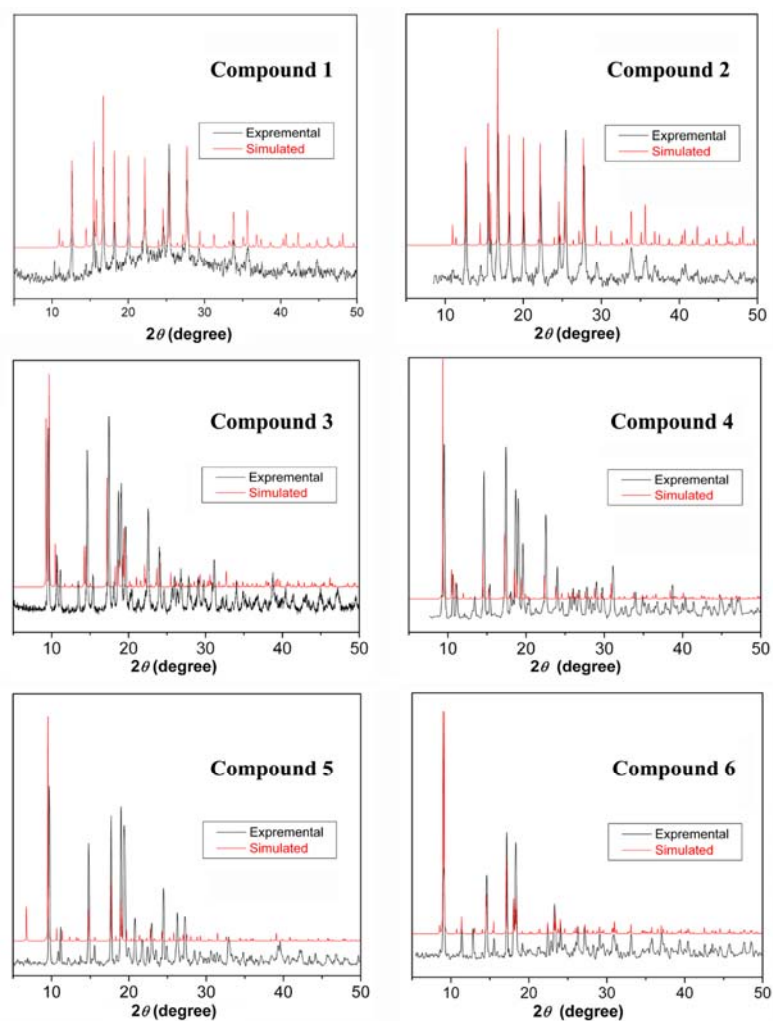

Figure S3 PXRD patterns of compounds 1–6..

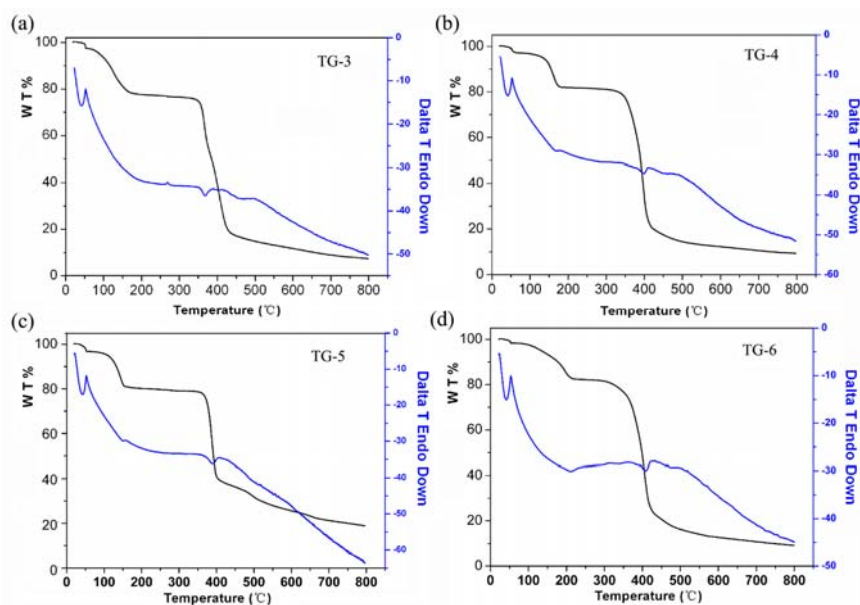

Figure S4. DTA-TGA curves of compounds 3–6

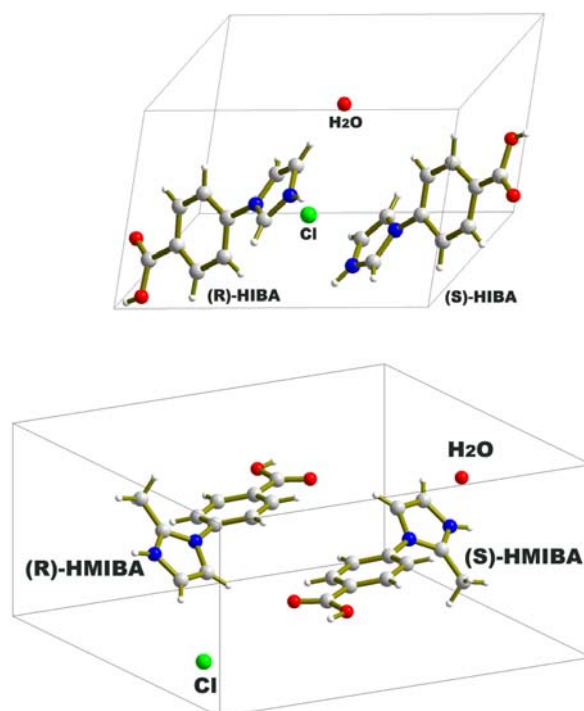

**Figure S5** Crystal structures of racemic chiral ligands of HIBA and HMIBA (only a pair of enantiomers are depicted in each of the unit-cell).

**Table S2** Selected bond lengths (Å) and angles (°) for 1–6

| Compound <b>1<sup>a</sup></b> |            |                     |            |
|-------------------------------|------------|---------------------|------------|
| Zn(1)–O(1)#1                  | 1.929(3)   | Zn(1)–N(1)#3        | 2.020(4)   |
| Zn(1)–O(1)#2                  | 1.929(3)   | Zn(1)–N(1)          | 2.020(4)   |
| O(1)#1–Zn(1)–O(1)#2           | 102.4(2)   | O(1)#1–Zn(1)–N(1)#3 | 110.02(15) |
| O(1)#1–Zn(1)–N(1)             | 117.31(14) | O(1)#2–Zn(1)–N(1)#3 | 117.31(14) |
| O(1)#2–Zn(1)–N(1)             | 110.02(15) | N(1)–Zn(1)–N(1)#3   | 100.5(2)   |
| Compound <b>2<sup>b</sup></b> |            |                     |            |
| Co(1)–O(1)#1                  | 1.9314(19) | Co(1)–N(1)#3        | 2.020(2)   |

|                     |            |                   |            |
|---------------------|------------|-------------------|------------|
| Co(1)–O(1)#2        | 1.9314(19) | Co(1)–N(1)        | 2.020(2)   |
| O(1)#1–Co(1)–O(1)#2 | 100.12(15) | O(1)#1–Co(1)–N(1) | 118.19(9)  |
| O(1)#1–Co(1)–N(1)#3 | 110.63(9)  | O(1)#2–Co(1)–N(1) | 110.63(9)  |
| O(1)#2–Co(1)–N(1)#3 | 118.19(9)  | N(1)#3–Co(1)–N(1) | 100.07(13) |

---

Compound **3<sup>c</sup>**

---

|                     |            |                     |            |
|---------------------|------------|---------------------|------------|
| Cd(1)–N(3)          | 2.242(3)   | Cd(1)–O(4)#2        | 2.334(3)   |
| Cd(1)–N(1)          | 2.262(3)   | Cd(1)–O(2)#1        | 2.365(3)   |
| Cd(1)–O(1)#1        | 2.325(2)   | Cd(1)–O(3)#2        | 2.379(3)   |
| N(3)–Cd(1)–N(1)     | 112.54(14) | O(1)#1–Cd(1)–O(2)#1 | 56.10(10)  |
| N(3)–Cd(1)–O(1)#1   | 93.17(11)  | O(4)#2–Cd(1)–O(2)#1 | 124.93(12) |
| N(1)–Cd(1)–O(1)#1   | 138.38(11) | N(3)–Cd(1)–O(3)#2   | 84.94(12)  |
| N(3)–Cd(1)–O(4)#2   | 136.39(12) | N(1)–Cd(1)–O(3)#2   | 93.09(10)  |
| N(1)–Cd(1)–O(4)#2   | 89.22(13)  | O(1)#1–Cd(1)–O(3)#2 | 122.41(10) |
| O(1)#1–Cd(1)–O(4)#2 | 93.90(10)  | O(4)#2–Cd(1)–O(3)#2 | 55.43(12)  |
| N(3)–Cd(1)–O(2)#1   | 94.13(12)  | O(2)#1–Cd(1)–O(3)#2 | 178.23(9)  |
| N(1)–Cd(1)–O(2)#1   | 88.65(10)  |                     |            |

---

Compound **4<sup>d</sup>**

---

|                     |           |                     |            |
|---------------------|-----------|---------------------|------------|
| Cd(1)–N(1)#1        | 2.253(4)  | Cd(1)–O(1)#3        | 2.287(4)   |
| Cd(1)–N(1)          | 2.253(4)  | Cd(1)–O(2)#2        | 2.431(4)   |
| Cd(1)–O(1)#2        | 2.287(4)  | Cd(1)–O(2)#3        | 2.431(4)   |
| N(1)#1–Cd(1)–N(1)   | 106.5(3)  | O(1)#2–Cd(1)–O(2)#2 | 55.22(13)  |
| N(1)#1–Cd(1)–O(1)#2 | 96.68(16) | O(1)#3–Cd(1)–O(2)#2 | 113.36(16) |

|                     |            |                     |            |
|---------------------|------------|---------------------|------------|
| N(1)–Cd(1)–O(1)#2   | 92.54(16)  | N(1)#1–Cd(1)–O(2)#3 | 146.95(14) |
| N(1)#1–Cd(1)–O(1)#3 | 92.54(15)  | N(1)–Cd(1)–O(2)#3   | 86.33(19)  |
| N(1)–Cd(1)–O(1)#3   | 96.68(16)  | O(1)#2–Cd(1)–O(2)#3 | 113.36(16) |
| O(1)#2–Cd(1)–O(1)#3 | 164.6(3)   | O(1)#3–Cd(1)–O(2)#3 | 55.22(13)  |
| N(1)#1–Cd(1)–O(2)#2 | 86.33(19)  | O(2)#2–Cd(1)–O(2)#3 | 99.3(2)    |
| N(1)–Cd(1)–O(2)#2   | 146.95(14) |                     |            |

---

Compound **5<sup>e</sup>**

---

|                     |            |                     |            |
|---------------------|------------|---------------------|------------|
| Co(1)–O(2)#1        | 2.070(3)   | Co(1)–N(2)#3        | 2.080(3)   |
| Co(1)–O(2)#2        | 2.070(3)   | Co(1)–O(1)#1        | 2.323(3)   |
| Co(1)–N(2)          | 2.080(3)   | Co(1)–O(1)#2        | 2.323(3)   |
| O(2)#1–Co(1)–O(2)#2 | 163.4(2)   | N(2)–Co(1)–O(1)#1   | 87.39(12)  |
| O(2)#1–Co(1)–N(2)   | 95.55(13)  | N(2)#3–Co(1)–O(1)#1 | 151.01(12) |
| O(2)#2–Co(1)–N(2)   | 94.18(13)  | O(2)#1–Co(1)–O(1)#2 | 108.02(13) |
| O(2)#1–Co(1)–N(2)#3 | 94.18(13)  | O(2)#2–Co(1)–O(1)#2 | 59.17(13)  |
| O(2)#2–Co(1)–N(2)#3 | 95.55(13)  | N(2)–Co(1)–O(1)#2   | 151.01(12) |
| N(2)–Co(1)–N(2)#3   | 107.93(18) | N(2)#3–Co(1)–O(1)#2 | 87.39(12)  |
| O(2)#1–Co(1)–O(1)#1 | 59.17(13)  | O(1)#1–Co(1)–O(1)#2 | 90.39(17)  |
| O(2)#2–Co(1)–O(1)#1 | 108.02(13) |                     |            |

---

Compound **6<sup>f</sup>**

---

|                 |           |                 |          |
|-----------------|-----------|-----------------|----------|
| Cd(1)–N(3)      | 2.225(10) | Cd(1)–O(3)      | 2.311(6) |
| Cd(1)–O(1)      | 2.289(5)  | Cd(1)–O(2)      | 2.437(5) |
| Cd(1)–N(1)      | 2.300(7)  | Cd(1)–O(4)      | 2.448(7) |
| N(3)–Cd(1)–O(1) | 95.6(3)   | N(1)–Cd(1)–O(2) | 142.4(2) |

|                 |           |                 |          |
|-----------------|-----------|-----------------|----------|
| N(3)–Cd(1)–N(1) | 106.0(3)  | O(3)–Cd(1)–O(2) | 104.2(2) |
| O(1)–Cd(1)–N(1) | 93.0(2)   | N(3)–Cd(1)–O(4) | 151.9(3) |
| N(3)–Cd(1)–O(3) | 96.5(3)   | O(1)–Cd(1)–O(4) | 108.6(3) |
| O(1)–Cd(1)–O(3) | 157.3(2)  | N(1)–Cd(1)–O(4) | 87.3(3)  |
| N(1)–Cd(1)–O(3) | 101.9(2)  | O(3)–Cd(1)–O(4) | 56.0(2)  |
| N(3)–Cd(1)–O(2) | 97.4(3)   | O(2)–Cd(1)–O(4) | 85.4(3)  |
| O(1)–Cd(1)–O(2) | 55.23(19) |                 |          |

---

<sup>a</sup>Symmetry transformations used to generate equivalent atoms:

#1  $-x-1, y-1, -z$     #2  $x+1, y-1, z$     #3  $-x, y, -z$     #4  $x-1, y+1, z$

<sup>b</sup>Symmetry transformations used to generate equivalent atoms:

#1  $-x-1, y-1, -z$     #2  $x+1, y-1, z$     #3  $-x, y, -z$     #4  $x-1, y+1, z$

<sup>c</sup>Symmetry transformations used to generate equivalent atoms:

#1  $x-1/2, -y+3, z$     #2  $-x+1, -y+1, z-1/2$     #3  $x+1/2, -y+3, z$     #4  
 $-x+1, -y+1, z+1/2$

<sup>d</sup>Symmetry transformations used to generate equivalent atoms:

#1  $y, x, -z+1$     #2  $x-1/2, -y+3/2, -z$     #3  $-y+3/2, x-1/2, z+1$     #4  
 $y+1/2, -x+3/2, z-1$

<sup>e</sup>Symmetry transformations used to generate equivalent atoms:

#1  $-y+1/2, x+1/2, z+1$     #2  $x+1/2, -y+1/2, -z$     #3  $y, x, -z+1$     #4  
 $y-1/2, -x+1/2, z-1$

<sup>f</sup>Symmetry transformations used to generate equivalent atoms:

#1  $-x+3/2, y+1/2, z$     #2  $-x+5/2, y+0, z-1/2$     #3  $-x+3/2, y-1/2, z$     #4  
 $-x+5/2, y+0, z+1/2$
